# Supplementary material for: Frequency-domain equalization for OFDMA-based multiuser MIMO systems with improper modulation schemes
Source: Springer Nature journal article supplement (doi:10.1186/1687-6180-2011-73), 2011-09-23

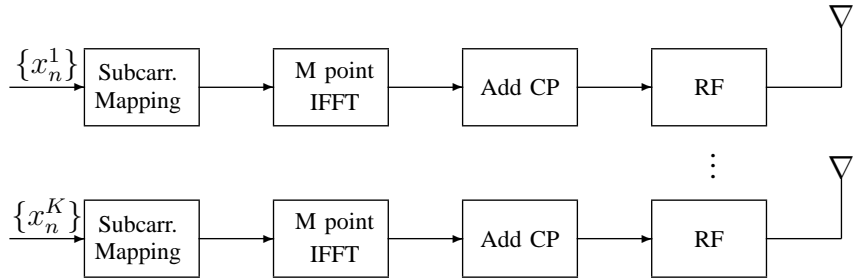

Supplement: 13634_2010_71_MOESM1_ESM.pdf [file 13634_2010_71_MOESM1_ESM.pdf]
